# Supplementary material for: An ABA triblock copolymer strategy for intrinsically stretchable semiconductors
Source: Royal Society of Chemistry journal article supplement (doi:10.1039/c4tc02476a), 2015-01-01
Supplement: c4tc02476a1.pdf [file c4tc02476a1.pdf]

## Electronic Supporting Information

### An ABA Triblock Copolymer Strategy for Intrinsically Stretchable Semiconductor

Rui Peng,<sup>a</sup> Daqing Hu,<sup>a</sup> Mengjie Chen,<sup>a</sup> Bo Pang,<sup>a</sup> Guobing Zhang,<sup>a</sup> Xianghua Wang,<sup>a</sup> Hongbo Lu,<sup>a,b</sup> Kilwon Cho,<sup>c</sup> Longzhen Qiu<sup>a,b\*</sup>

<sup>a</sup> Key Lab of Special Display Technology, Ministry of Education, National Engineering Lab of Special Display Technology, State Key Lab of Advanced Display Technology, Academy of Opto-Electronic Technology, Hefei University of Technology, Hefei, 230009, China.

<sup>b</sup>Key Lab of Advanced Function Materials and Devices, Anhui Province, School of Chemical Engineering, Hefei University of Technology, Hefei, 230009, China.

<sup>c</sup> Department of Chemical Engineering, Pohang University of Science and Technology, Pohang, 790-784, Korea.

## Table of contents

|                                                                                                                                                     |    |
|-----------------------------------------------------------------------------------------------------------------------------------------------------|----|
| Figure S1. The <sup>1</sup> H NMR spectrum of Br-PMA-Br (CDCl <sub>3</sub> ) .....                                                                  | S2 |
| Figure S2. The <sup>1</sup> H NMR spectrum of N <sub>3</sub> -PMA-N <sub>3</sub> (CDCl <sub>3</sub> ) .....                                         | S2 |
| Figure S3. The <sup>1</sup> H NMR spectrum of ethynyl-terminated poly(3-hexylthiophene) (CDCl <sub>3</sub> ) .....                                  | S3 |
| Figure S4. FT-IR spectra of Br-PMA-Br, N <sub>3</sub> -PMA-N <sub>3</sub> and P3HT-PMA-P3HT.....                                                    | S3 |
| Figure S5. Output and transfer characteristics of a top-contact OTFT based on P3HT <sub>1</sub> , P3HT <sub>2</sub> at V <sub>D</sub> =-60V.. ..... | S4 |

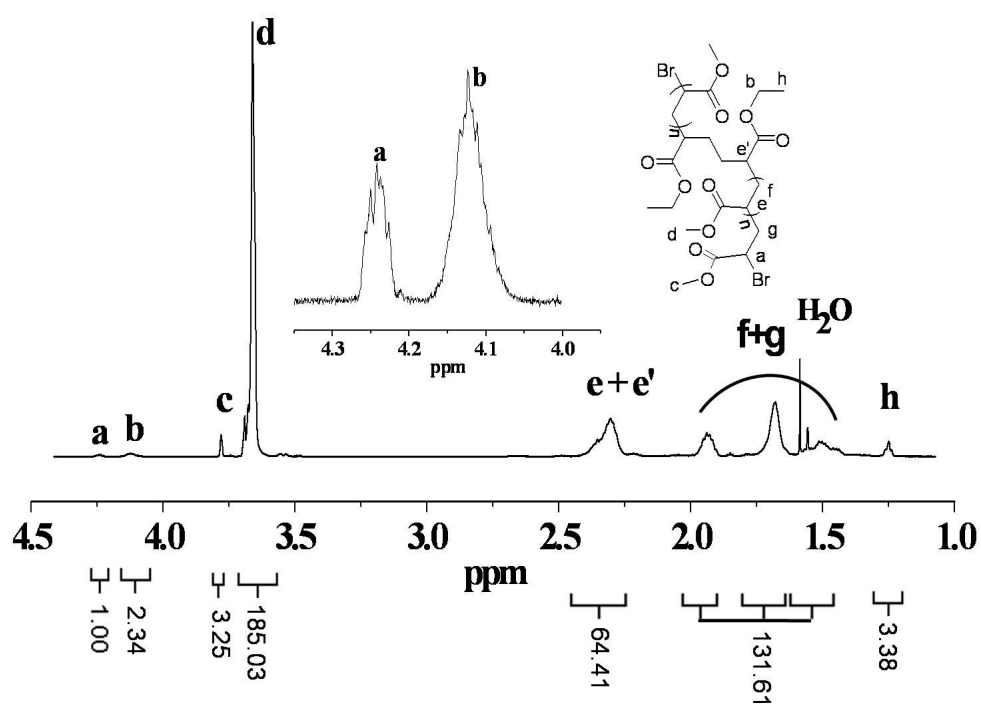

Figure S1. The HNMR spectrum of Br-PMA-Br ( $\text{CDCl}_3$ )

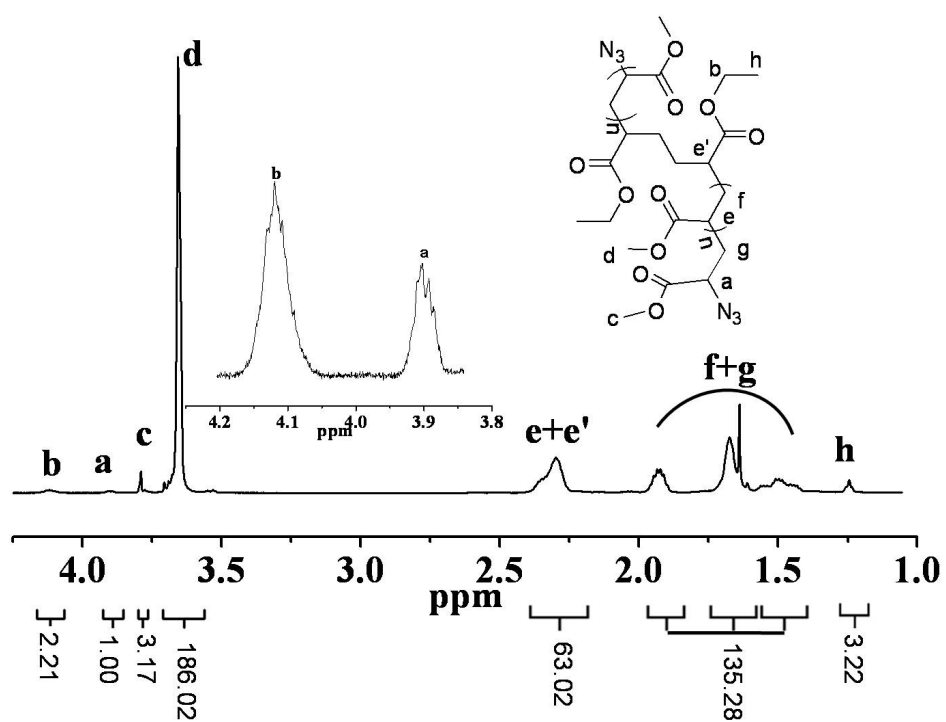

Figure S2. The HNMR spectrum of  $\text{N}_3$ -PMA- $\text{N}_3$  ( $\text{CDCl}_3$ )

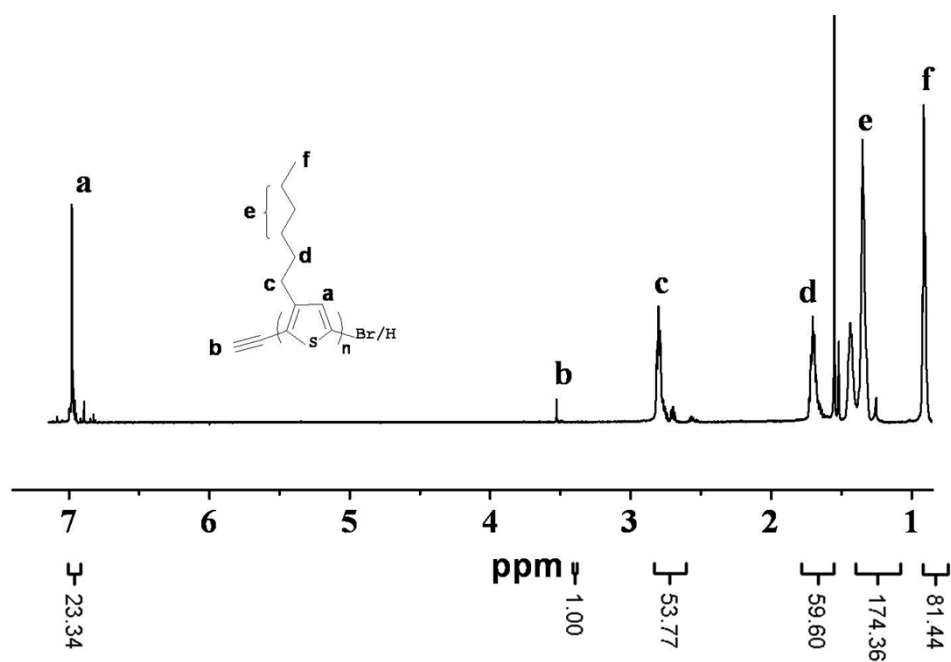

Figure S3. The  $^1\text{H}$ NMR spectrum of ethynyl-terminated poly(3-hexylthiophene) ( $\text{CDCl}_3$ )

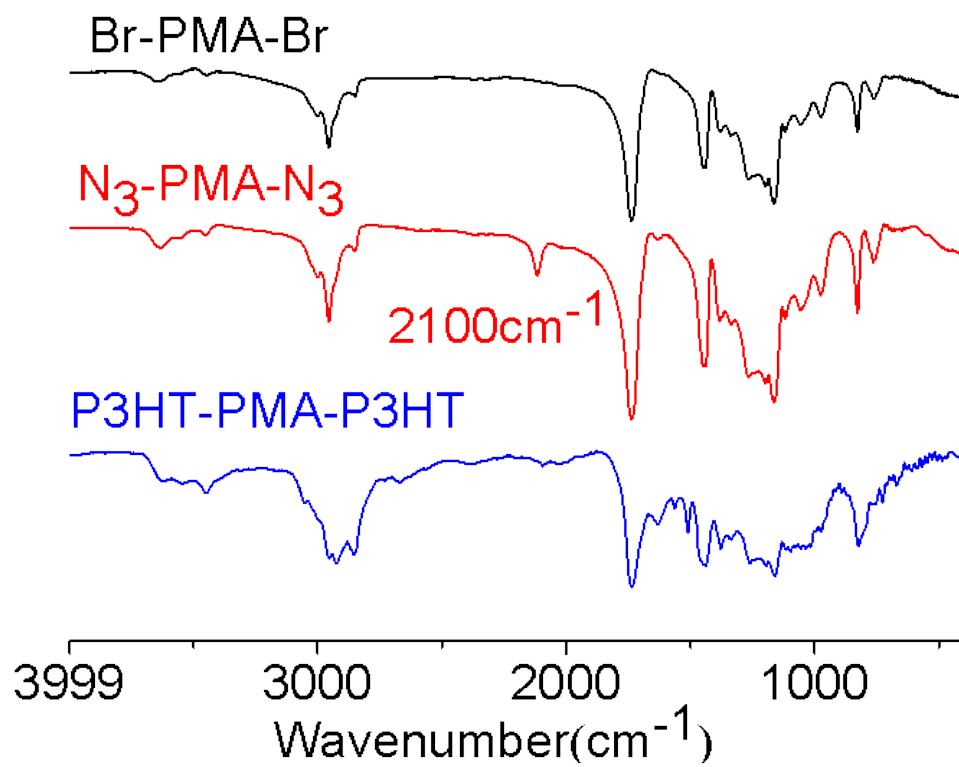

Figure S4. FT-IR spectra of Br-PMA-Br,  $\text{N}_3$ -PMA- $\text{N}_3$  and P3HT-PMA-P3HT, the signal at  $2100\text{ cm}^{-1}$  was attributed to the azide stretching frequency.

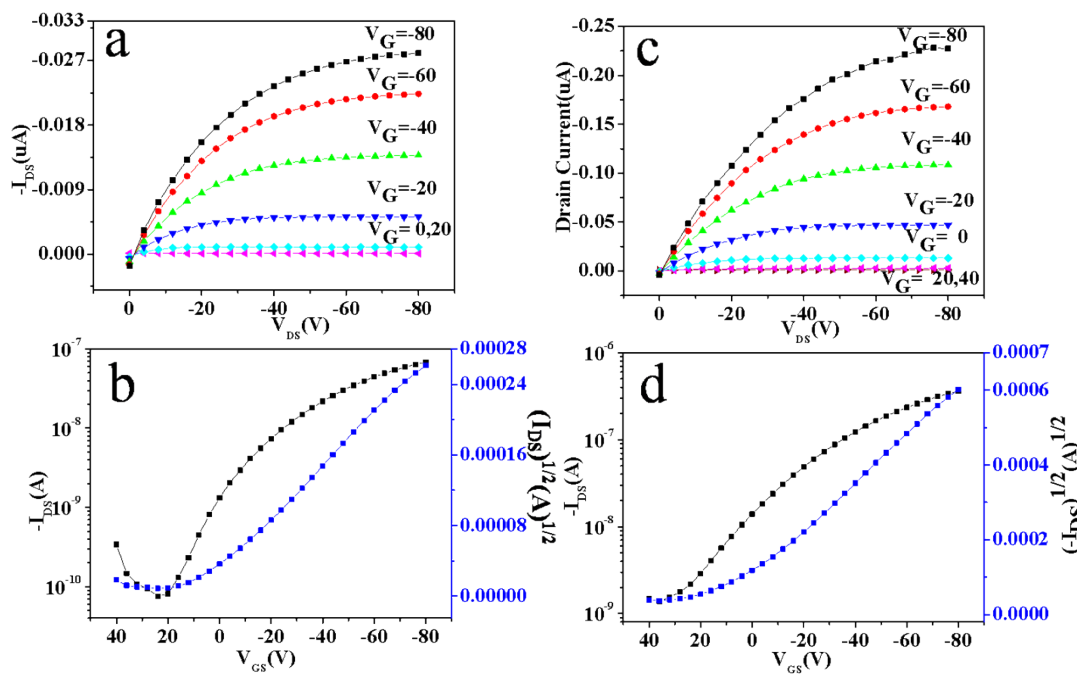

Figure S5. Output and transfer characteristics of a top-contact OTFT based on P3HT<sub>1</sub>, (a, b,  $\overline{Mn}$  = 3800, HNMR,  $\overline{Mn}$  = 5200, GPC), P3HT<sub>2</sub> (c, d  $\overline{Mn}$  = 6600, HNMR,  $\overline{Mn}$  = 5600, GPC) at  $V_D = -60$  V. The maximum field-effect mobilities of P3HT<sub>1</sub> and P3HT<sub>2</sub> were up to  $4.2 \times 10^{-4}$  and  $4.5 \times 10^{-4} \text{ cm}^2/\text{V.s}$  respectively.
